# Supplementary material for: Sirtuins regulate proteomic responses near thermal tolerance limits in the blue mussels Mytilus galloprovincialis and Mytilus trossulus
Source: Oxford University Press journal article supplement (doi:10.1242/jeb.160325), 2017-01-01
Supplement: jeb160325supp.pdf [file jeb160325supp.pdf]

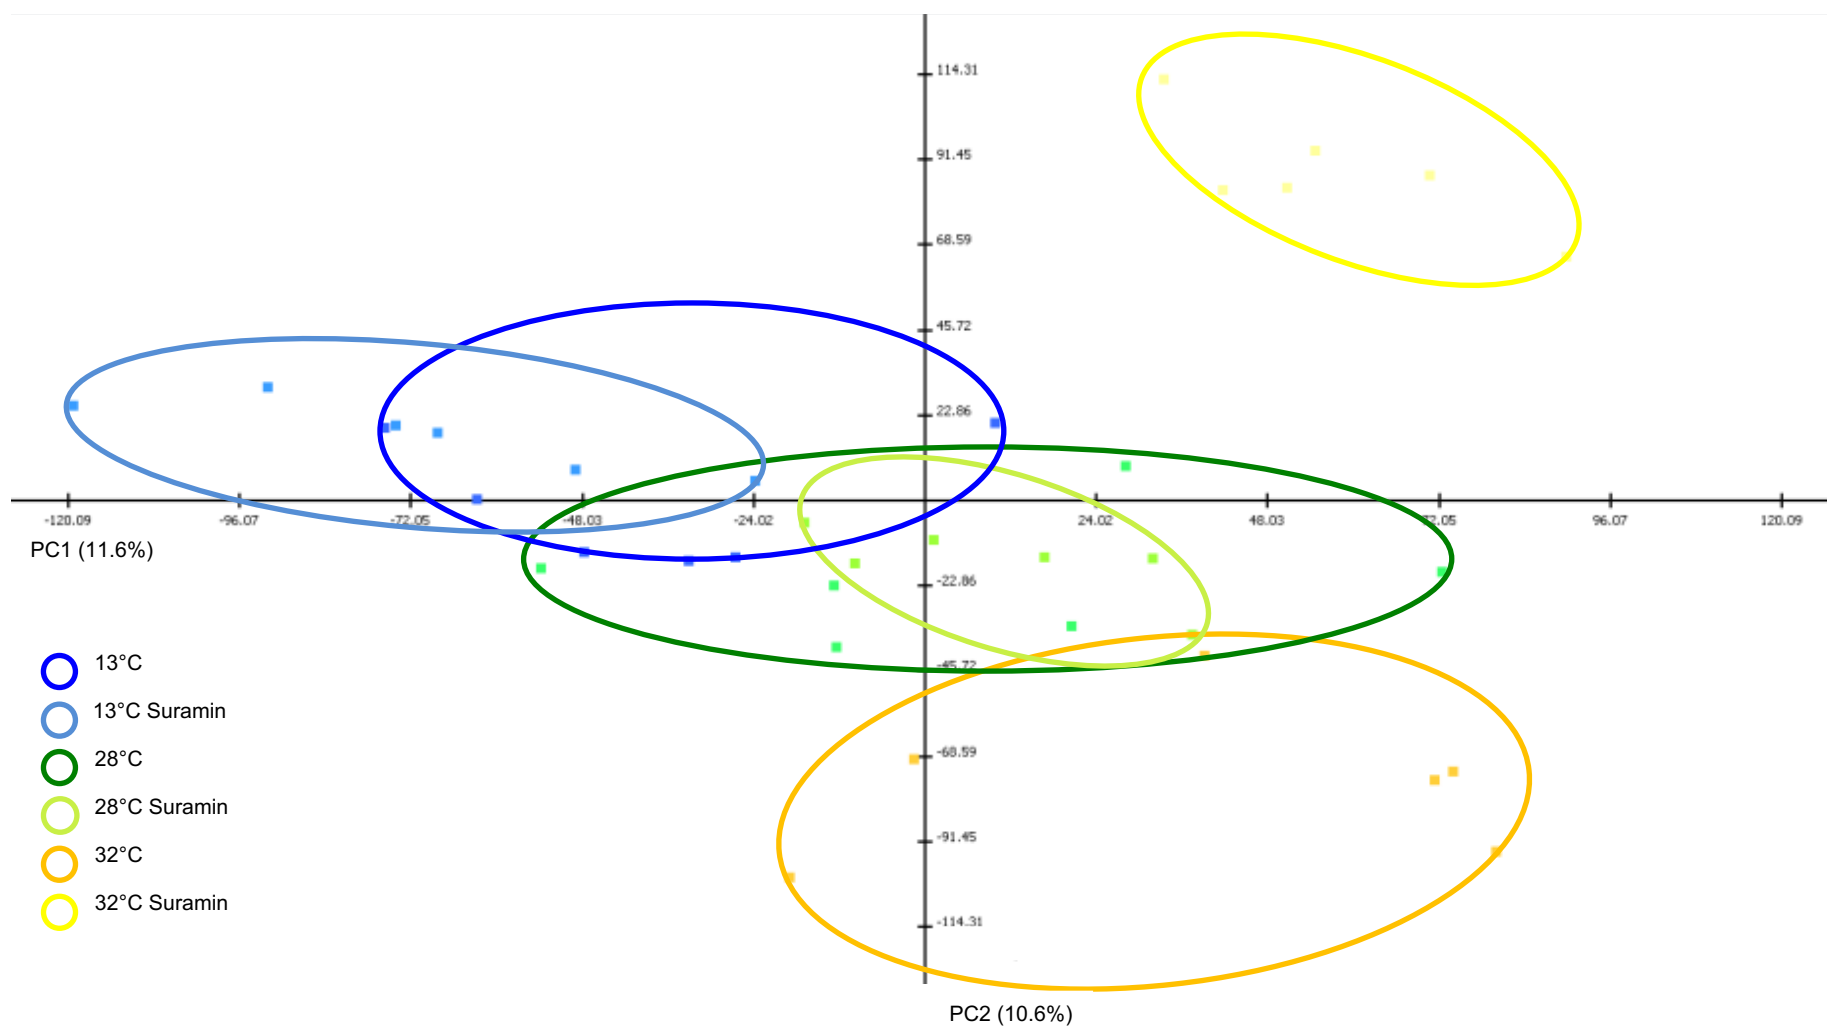

**Figure S1. Principal component analysis (PCA) of the effect of suramin during heat shock in *M. trossulus* with 35°C heat shock removed.** Each symbol represents a single mussel gill sample ( $N=6$  per species for each treatment). Percentages represent the total variation in the dataset accounted for by PC1 and PC2.

**Table S1A.** Protein identifications for *M. galloprovincialis* mussels with estimated and predicted molecular weight (kDa) and isoelectric point (pI) values, GenBank ID, Mascot score, number of peptides matching, sequence coverage, abundance levels (relative to 13°C) and putative functions.

[Click here to Download Table S1A](#)

**Table S1B.** Protein identifications for *M. trrossulus* mussels with estimated and predicted molecular weight (kDa) and isoelectric point (pI) values, GenBank ID, Mascot score, number of peptides matching, sequence coverage, abundance levels (relative to 13°C) and putative functions.

[Click here to Download Table S1B](#)
